# Supplementary material for: Genome-wide SNP genotyping highlights the role of natural selection in Plasmodium falciparum population divergence
Source: PubMed Central journal article supplement (PMC2646275; doi:10.1186/gb-2008-9-12-r171), 2008-12-15

A

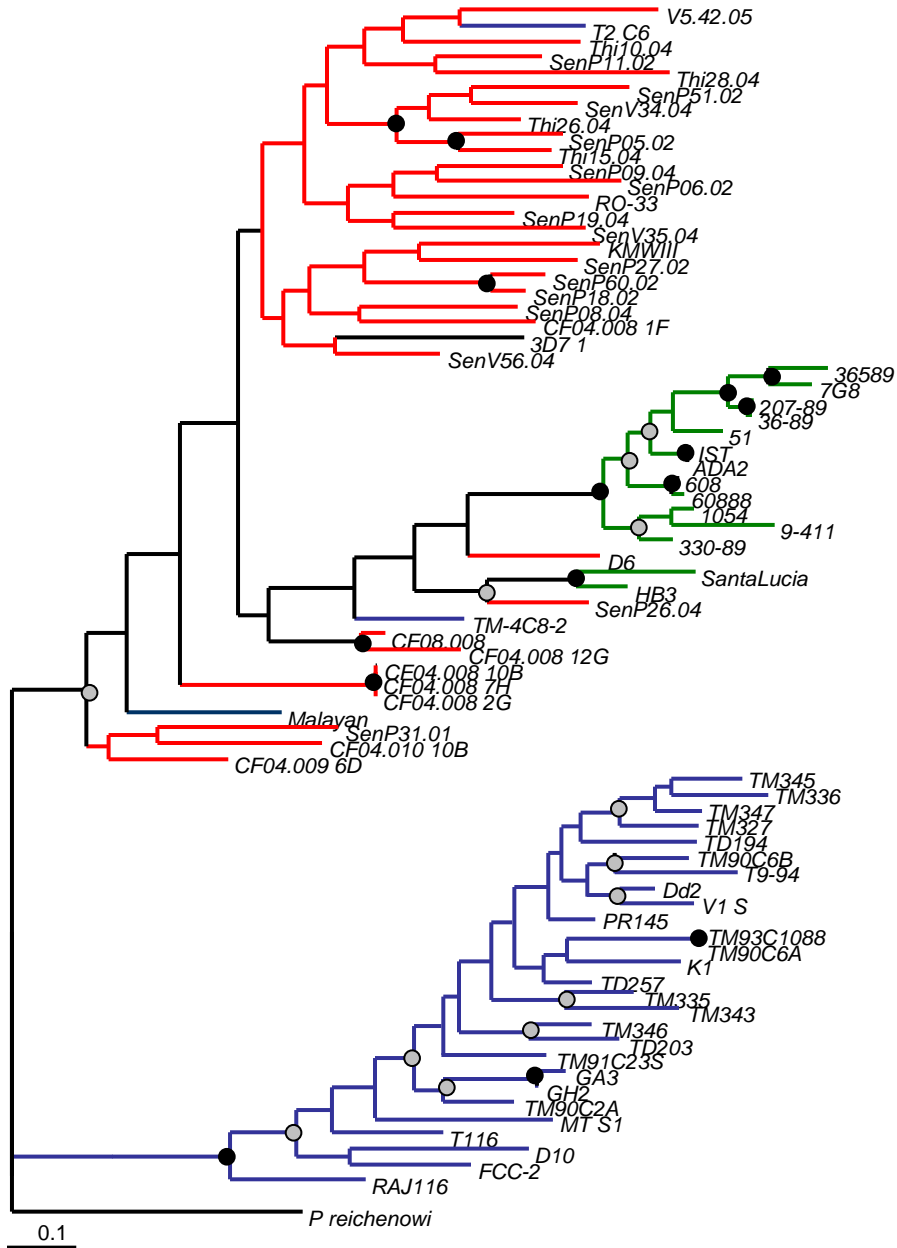

B

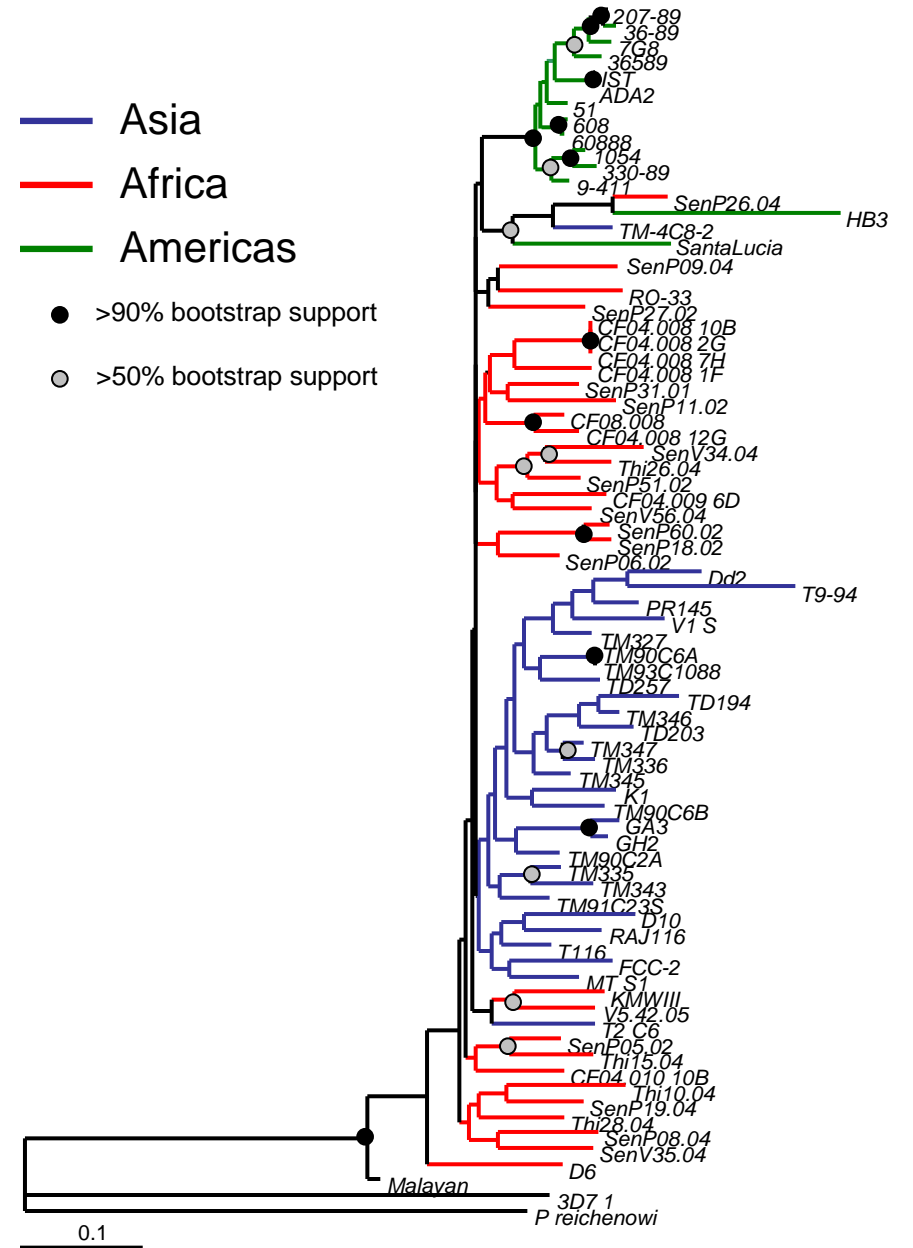

Supplement: gb-2008-9-12-r171-S6.pdf [file gb-2008-9-12-r171-S6.pdf]
